# Supplementary material for: From Shadow IT to Business-managed IT: a qualitative comparative analysis to determine configurations for successful management of IT by business entities
Source: Springer Nature journal article supplement (doi:10.1007/s10257-020-00472-6), 2020-06-01
Supplement: MOESM1 [file 18187106]

# Online Resource 1

**Article Title: From Shadow IT to Business-managed IT: A Qualitative Comparative Analysis to Determine Configurations for Successful Management of IT by Business Entities**

## Interview Guide

|                                                                               |                                                                                      | + Positive cases                                         | - Negative cases                                                                                                                 |
|-------------------------------------------------------------------------------|--------------------------------------------------------------------------------------|----------------------------------------------------------|----------------------------------------------------------------------------------------------------------------------------------|
| <b>Description and measures for each considered positive or negative case</b> |                                                                                      |                                                          |                                                                                                                                  |
| <b>Description</b>                                                            |                                                                                      |                                                          |                                                                                                                                  |
| <b>Context</b>                                                                | • Short qualitative description of the case: ...                                     |                                                          |                                                                                                                                  |
| <b>Effects</b>                                                                | • Positive for IT and / or business: ...<br>• Negative for IT and / or business: ... |                                                          |                                                                                                                                  |
| <b>Causes</b>                                                                 | • Identified causes for the case considered: ...                                     |                                                          |                                                                                                                                  |
| <b>Measures</b>                                                               | <b>Level</b>                                                                         | <b>Guiding questions for measures of case considered</b> |                                                                                                                                  |
|                                                                               | <b>Organizational</b>                                                                | Identification                                           | • How was the Shadow IT solution discovered (e.g., network monitoring, helpdesk queries, etc.)?                                  |
|                                                                               |                                                                                      | Timeframe                                                | • When was the Shadow IT solution created, when was it discovered?                                                               |
|                                                                               |                                                                                      | Stakeholders                                             | • Which and how many persons / roles were involved (team size / organization, external versus internal, technical skills, etc.)? |
|                                                                               |                                                                                      | Approach with Shadow IT                                  | • How has been dealt with the discovered Shadow IT solution?                                                                     |
|                                                                               |                                                                                      | Organizational support                                   | • Was there implementation support from the IT department? If yes, which (e.g., in-house consultants)?                           |
|                                                                               | <b>Technical</b>                                                                     | Development approach                                     | • Development approach for Shadow IT development: Linear (e.g., waterfall) or iterative (e.g., scrum)?                           |
|                                                                               |                                                                                      | Technical support                                        | • Was there any tool- or infrastructure support (e.g. DevOps environment, development platform, etc.) from the IT department?    |
|                                                                               |                                                                                      | System architecture                                      | • Shadow IT architecture: On-premise or SaaS? How integrated into official IT?                                                   |
|                                                                               | <b>General</b>                                                                       | System quality                                           | • What is the system quality of the Shadow IT solution (with regard to development process, business processing, etc.)?          |
|                                                                               |                                                                                      | Requirements stability                                   | • How stable are / were the requirements for the Shadow IT solution?                                                             |
|                                                                               |                                                                                      | Criticality / relevance                                  | • How critical / relevant is the application for with regard to company strategy, security, compliance, etc.?                    |
|                                                                               |                                                                                      | Scope                                                    | • How narrow / broad is the scope of the solution?                                                                               |

**Fig. A1 Guiding Questions for Measures of Positive/Negative Cases Discussed in Interviews**

# Data Matrix

| Case  | Outcome         |                      |                     | Conditions (incl. measures) |                   |            |             |       |          |            |        |          |                |          |             |           |
|-------|-----------------|----------------------|---------------------|-----------------------------|-------------------|------------|-------------|-------|----------|------------|--------|----------|----------------|----------|-------------|-----------|
|       | Positive (case) | Distinct (pos. case) | General (pos. case) | Aligned                     | Approved / agreed | Org. split | Tech. split | Local | Specific | Standalone | Simple | Low-risk | Low-complexity | Volatile | Provisional | Ambiguous |
| P01-A | 1               | 1                    |                     | 0                           | 0                 | 0          | 0           | 1     | 1        | 1          | 1      |          | 1              | 1        | 1           |           |
| P01-B | 0               | 0                    |                     | 0                           | 0                 | 0          | 0           | 0     |          | 0          | 0      |          | 0              | 0        | 0           |           |
| P01-C | 1               |                      | 1                   | 1                           | 1                 | 1          |             | 1     |          | 1          | 1      |          | 1              | 1        | 1           | 1         |
| P02-A | 1               |                      | 1                   | 1                           | 1                 | 1          |             | 1     | 1        | 1          | 0      |          | 0              | 0        | 0           |           |
| P02-B | 1               | 1                    |                     | 1                           | 1                 |            |             | 1     | 1        | 1          | 0      |          | 0              | 0        | 0           |           |
| P03-A | 1               | 1                    |                     | 0                           | 0                 |            | (1)         | 1     | 1        |            | 0      |          | 0              | 0        |             | 0         |
| P03-B | 0               |                      | 0                   | 0                           | 0                 |            |             | 0     | 0        |            | 1      | (0)      | 1              | 0        | 0           |           |
| P03-C | 0               | 0                    |                     | 0                           | 0                 |            |             | 0     | 0        |            | 1      |          | 1              | 0        | 0           |           |
| P04-A | 1               |                      | 1                   | 1                           | 1                 | 1          |             | 1     | 1        |            | 0      |          | 0              | 0        | 0           |           |
| P05-A | 0               | 0                    |                     | 0                           | 0                 |            |             | 1     | 1        |            | 0      | 0        | (1)            | 0        | 0           |           |
| P05-B | 1               | 1                    |                     | 1                           | 1                 | 1          | 1           | 1     | 1        | 1          | 1      | 1        | 1              | 1        | 1           |           |
| P06-A | 1               | 1                    |                     | 1                           | 1                 | 1          | 1           | 0     | 0        |            | 1      | 1        | 1              | 0        | 0           |           |
| P06-B | 0               | 0                    |                     | 0                           | 0                 |            |             | 0     | 0        | 0          | 0      | 0        | 0              | 0        | 0           |           |
| P06-C | 1               | 1                    |                     | 1                           | 1                 | 1          | 1           | 1     | 1        |            | 1      | 1        |                | 0        | 0           |           |
| P07-A | 1               |                      | 1                   | 1                           | 1                 | 1          |             | 1     | 1        | 1          | 1      | 1        |                | 1        |             | 1         |
| P08   | -               |                      |                     | -                           |                   |            |             | -     |          |            | -      |          |                | -        |             |           |
| P09   | -               |                      |                     | -                           |                   |            |             | -     |          |            | -      |          |                | -        |             |           |
| P10   | -               |                      |                     | -                           |                   |            |             | -     |          |            | -      |          |                | -        |             |           |
| P11-A | 1               | 1                    |                     | 1                           | 1                 | 1          | 1           | 0     | 0        | 0          | 1      |          | 1              | 0        | 0           |           |
| P12-A | 1               | 1                    |                     | 1                           | 1                 | 1          |             | 1     | 1        | 1          | 1      |          | 1              | 1        |             | 1         |
| P12-B | 0               | 0                    |                     | 0                           |                   | 0          |             | 0     | 0        | 0          | 0      | 0        | 0              | 0        | 0           |           |
| P13-A | 0               | 0                    |                     | 0                           | 0                 |            |             | 0     | 0        | 0          | 1      |          | 1              | 0        | 0           |           |
| P13-B | 1               |                      | 1                   | 1                           | 1                 |            |             | 1     | 1        | 1          | 1      |          | 1              | 1        | 1           |           |
| P14-A | 0               | 0                    |                     | 0                           | 0                 |            | 0           | 0     | 0        |            | 1      |          | 1              | 0        | 0           |           |
| P15-A | 1               | 1                    |                     | 1                           | 1                 | 1          | 1           | 1     | 1        |            | 0      |          | 0              | 0        | 0           |           |
| P15-B | 0               | 0                    |                     | 0                           | 0                 | (1)        |             | 0     |          | 0          | 0      |          | 0              | 0        | 0           |           |
| P15-C | 1               |                      | 1                   | 1                           | 1                 | 1          |             | 1     | 1        | 1          | 1      |          | 1              | 1        |             | 1         |
| P16-A | 1               | 1                    |                     | 1                           | 1                 | 1          | 1           | 1     | 1        |            | 1      |          | 1              | 1        | 1           |           |
| P16-B | 0               | 0                    |                     | 0                           | 0                 |            |             | 1     | 1        |            | 1      |          | 1              | 0        | 0           |           |
| P16-C | 1               |                      | 1                   | 1                           | 1                 | 1          | 1           | 1     | 1        |            | 1      | 1        |                | 1        |             | 1         |
| P16-D | 1               |                      | 1                   | 1                           | 1                 | 1          |             | 1     | 1        |            | 1      |          | 1              | 0        | 0           |           |
| P17-A | 1               |                      | 1                   | 1                           | 1                 | 1          |             | 1     | 1        |            | 0      | 0        |                | 0        | 0           |           |
| P18-A | 0               | 0                    |                     | 0                           | 0                 |            |             | 1     | 1        |            | 1      |          | 1              | 0        | 0           |           |
| P18-B | 0               | 0                    |                     | 0                           | 0                 |            |             | 1     | 1        |            | 0      |          | 0              | 0        | 0           |           |
| P19-A | 1               |                      | 1                   | 1                           | 1                 | 1          |             | 1     | 1        |            | 0      |          | 0              | 0        | 0           |           |
| P20   | -               |                      |                     | -                           |                   |            |             | -     |          |            | -      |          |                | -        |             |           |
| P21-A | 1               | 1                    |                     | 1                           | 1                 | 1          |             | 1     | 1        |            | 1      |          | 1              | 0        | 0           |           |
| P22   | -               |                      |                     | -                           |                   |            |             | -     |          |            | -      |          |                | -        |             |           |
| P23-A | 1               |                      | 1                   | 1                           | 1                 | 1          |             | 1     | 1        | 1          | 0      | 0        | 0              | 0        | 0           |           |
| P23-B | 1               | 1                    |                     | 1                           | 1                 |            | 1           | 1     | 1        |            | 0      | 0        |                | 0        | 0           |           |
| P23-C | 1               |                      | 1                   | 1                           | 1                 |            |             | 1     |          | 1          | 1      | 1        |                | 1        |             | 1         |
| P23-D | 1               | 1                    |                     | 1                           | 1                 | 1          | 1           | 1     | 1        |            | 0      |          | 0              | 0        | 0           |           |
| P24-A | 1               |                      | 1                   | 1                           | 1                 |            |             | 1     | 1        |            | 0      |          | 0              | 0        | 0           |           |
| P25   | -               |                      |                     | -                           |                   |            |             | -     |          |            | -      |          |                | -        |             |           |
| P26-A | 0               | 0                    |                     | 0                           | 0                 |            |             | 1     |          | 1          | 1      |          | 1              | 0        | 0           |           |
| P26-B | 1               | 1                    |                     | 1                           |                   | 1          |             | 1     | 1        | 1          | 1      |          | 1              | 1        |             | 1         |
| P27-A | 1               |                      | 1                   | 1                           | 1                 | 1          |             | 1     | 1        | 1          | 0      |          | 0              | 1        |             | 1         |
| P28   | -               |                      |                     | -                           |                   |            |             | -     |          |            | -      |          |                | -        |             |           |
| P29-A | 1               |                      | 1                   | 1                           | 1                 |            |             | 1     |          | 1          | 1      |          | 1              | 1        | 1           | 1         |

Fig. B1 Data Matrix (Including Measures and the Aggregated Conditions/Outcome)
